# Supplementary material for: Zero-valent metal catalyzed removal of thiocarbonylthio end groups from RAFT-made polystyrene: producing controllable bimodal molecular weight distribution
Source: Royal Society of Chemistry journal article supplement (doi:10.1039/c3py01327h), 2013-11-22
Supplement: c3py01327h.pdf [file c3py01327h.pdf]

# Supporting Information to

## Zero Valent Metal Catalyzed Removal of Thiocarbonylthio End Groups from RAFT-Made Polystyrene: Producing Controllable Bimodal Molecular Weight Distribution

Yang Wu, Junfei Zhao, Xiaofei Zhang, Jian Zhu, Wei Zhang, Zhengbiao Zhang\* and

Xiulin Zhu\*

Jiangsu Key Laboratory of Advanced Functional Polymer Design and Application, Department of Polymer Science and Engineering, College of Chemistry, Chemical Engineering and Materials Science, Soochow University, Suzhou 215123, China.

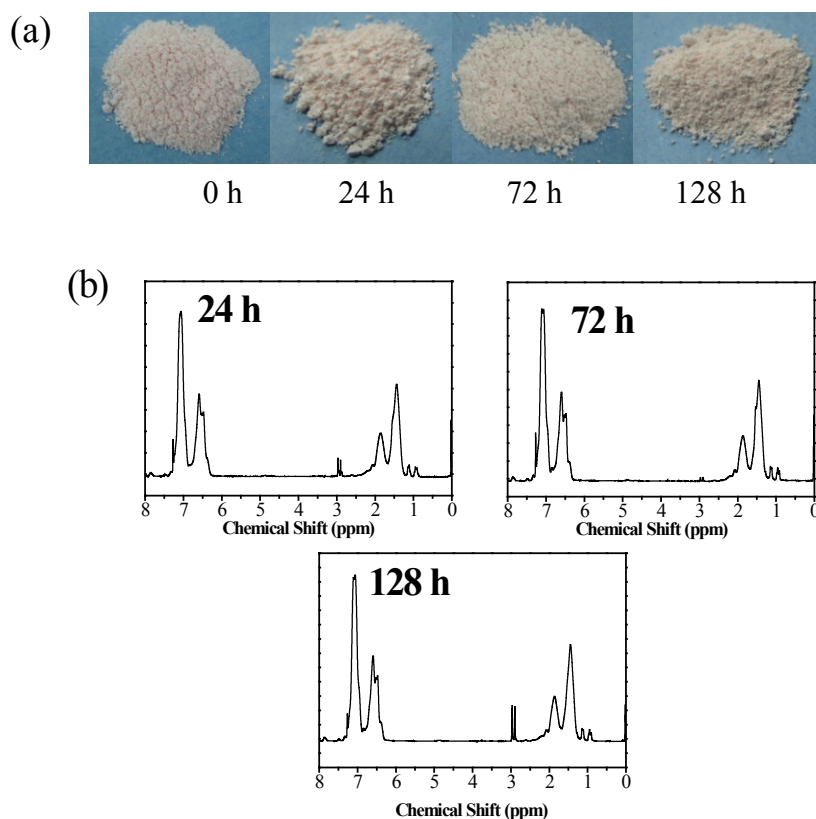

**Figure S1.** Photographs before and after the treatment of PS catalyzed by Cu(0) powder (a)  $^1\text{H}$  NMR spectra of resultant PS (b). Original PS:  $[\text{St}]_0/[\text{CPDB}]_0/[\text{AIBN}]_0 = 500/5/1$ , time = 117 h, conversion = 38.1 %, 60 °C, St = 15.0 mL, toluene = 5.0 mL; Treated conditions:  $[\text{PS}]_0/[\text{Cu}(0)]_0/[\text{PMDETA}]_0 = 1/5/5$ , PS = 0.2001 g, DMF = 1.0 mL, 25 °C, 24 h, 72 h, 128 h.

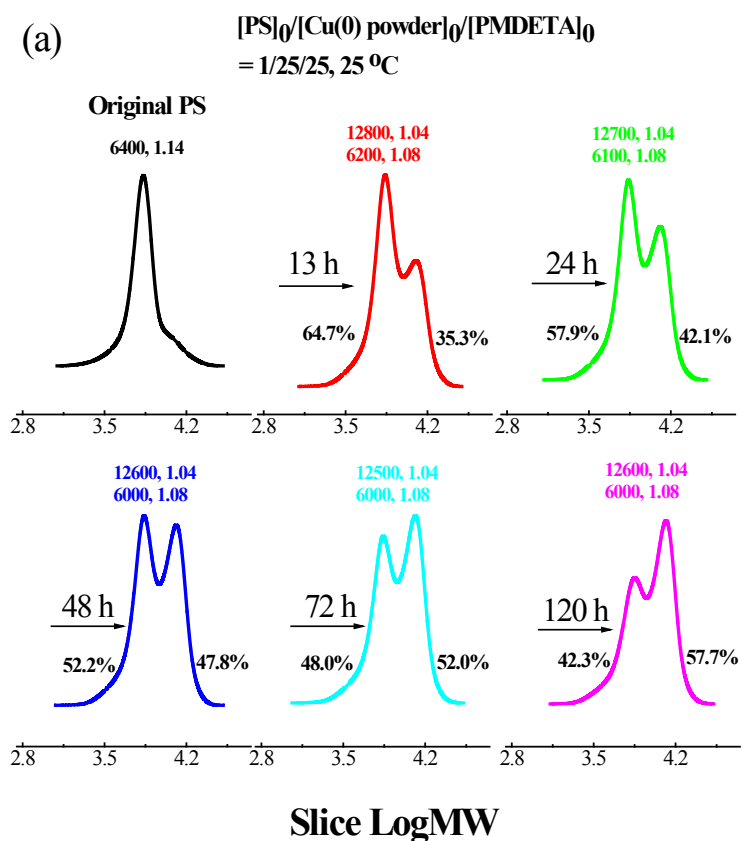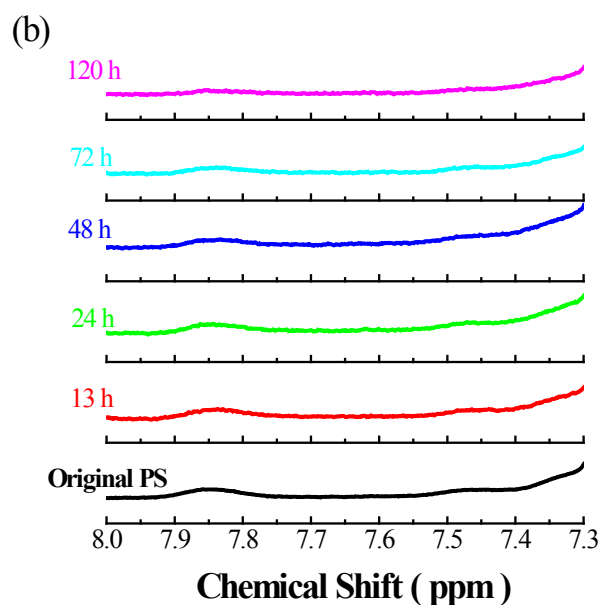

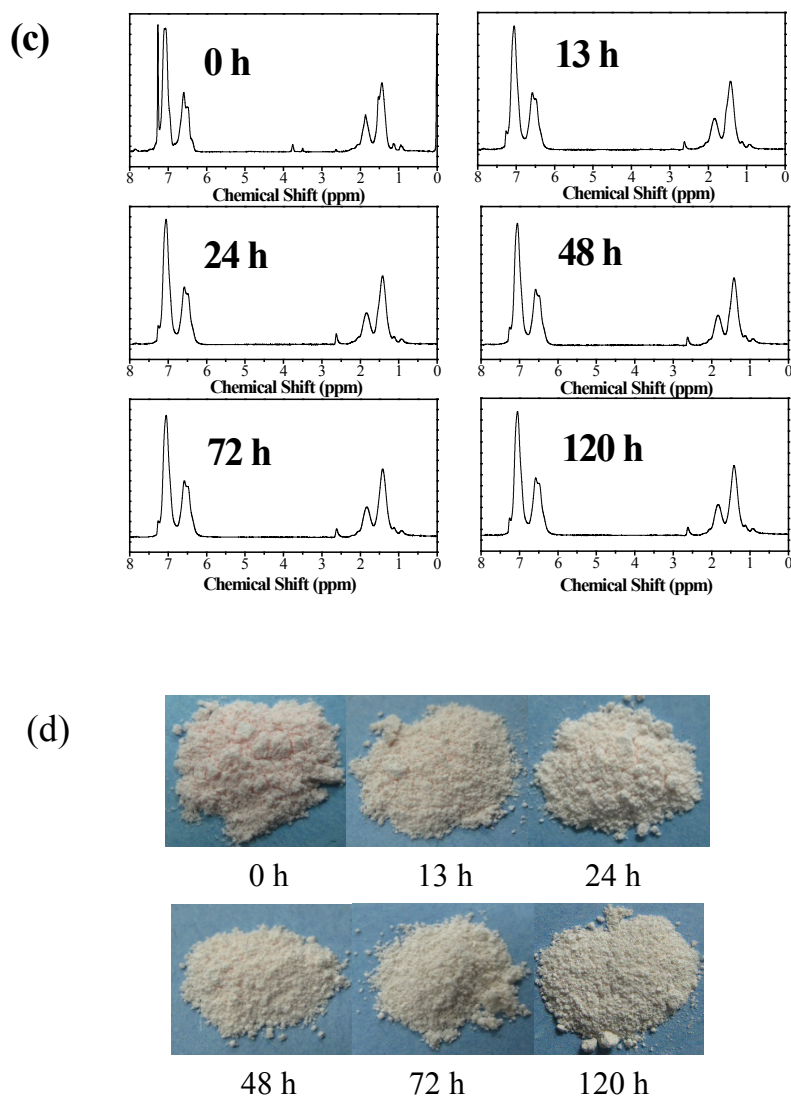

**Figure S2.** SEC traces (a) enlarged  $^1\text{H}$  NMR signals of thiocarbonylthio groups (b)  $^1\text{H}$  NMR spectra of original PS and resultant PS (c) and photographs (d) before and after the treatment of PS catalyzed by Cu(0) powder. Original PS:  $[\text{St}]_0/[\text{CPDB}]_0/[\text{AIBN}]_0 = 500/5/1$ , time = 71 h, conversion = 57.3 %, 60 °C, St = 5.0 mL, toluene = 2.0 mL; Treated conditions:  $[\text{PS}]_0/[\text{Cu}(0)]_0/[\text{PMDETA}]_0 = 1/25/25$ , PS = 0.2073 g, DMF = 1.8 mL, 25 °C, 13 h, 24 h, 48 h, 72 h, 120 h.

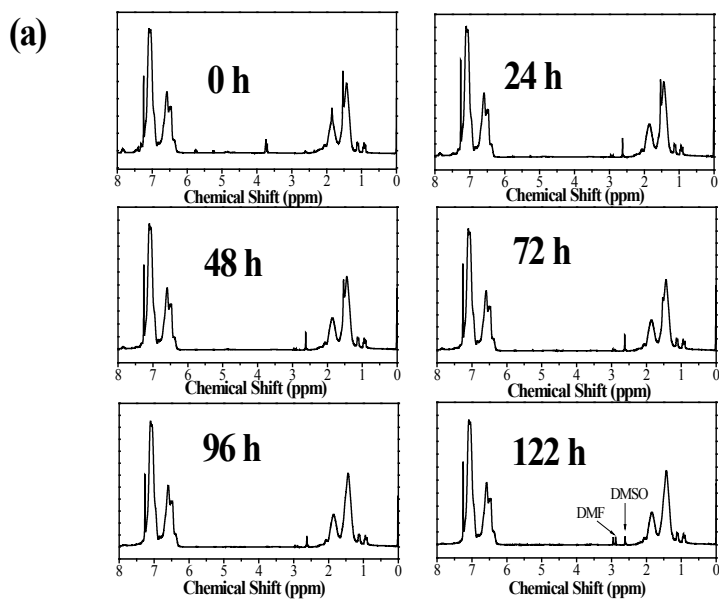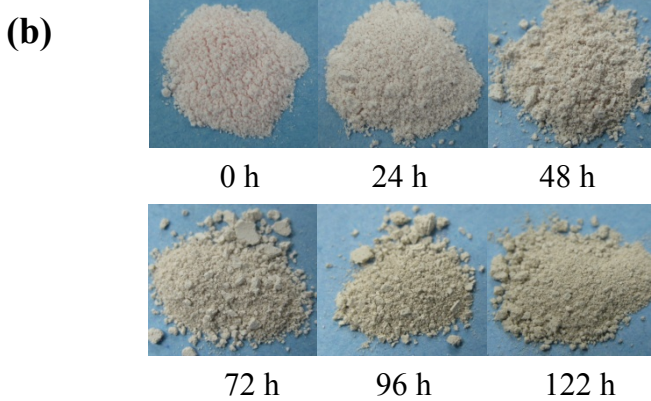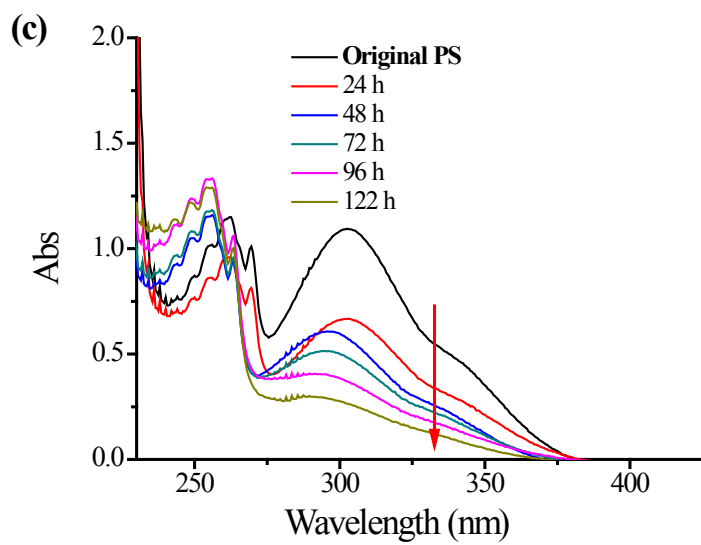

**Figure S3.**  $^1\text{H}$  NMR spectra of original PS and resultant PS (a), photographs (b) and UV-Vis spectra of the PS (c) before and after the treatment of PS catalyzed by Cu(0) powder/TEMPO. Original PS:  $[\text{St}]_0/[\text{CPDB}]_0/[\text{AIBN}]_0 = 500/5/1$ , time = 117 h, conversion = 38.1 %, 60 °C, St = 15.0 mL, toluene = 5.0 mL; Treated conditions:  $[\text{PS}]_0/[\text{Cu}(0)]_0/[\text{PMDETA}]_0/[\text{TEMPO}]_0 = 1/5/5/10$ , PS = 0.2001 g, DMF = 1.0 mL, 25 °C, 24 h, 48 h, 72 h, 96 h, 122 h.

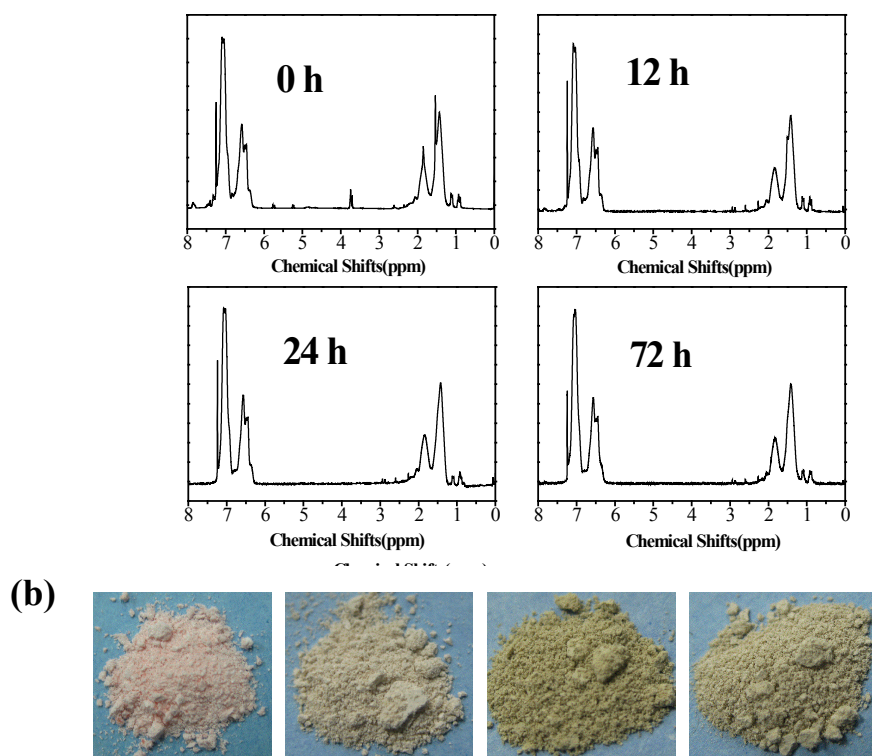

Figure S4. SEC traces (a) and enlarged  $^1\text{H}$  NMR signals of thiocarbonylthio groups (b) before and after the treatment of PS catalyzed by Cu(0) powder/TEMPO. Original PS:  $[\text{St}]_0/[\text{CPDB}]_0/[\text{AIBN}]_0 = 500/5/1$ , time = 117 h, Conversion = 38.1 %, 60 °C, St = 15.0 mL, toluene = 5.0 mL; Treated conditions:  $[\text{PS}]_0/[\text{Cu}(0)]_0/[\text{PMDETA}]_0/[\text{TEMPO}]_0 = 1/5/5/50$ , PS = 0.2003 g, DMF = 1.0 mL, 60 °C, 12 h, 24 h, 72 h.

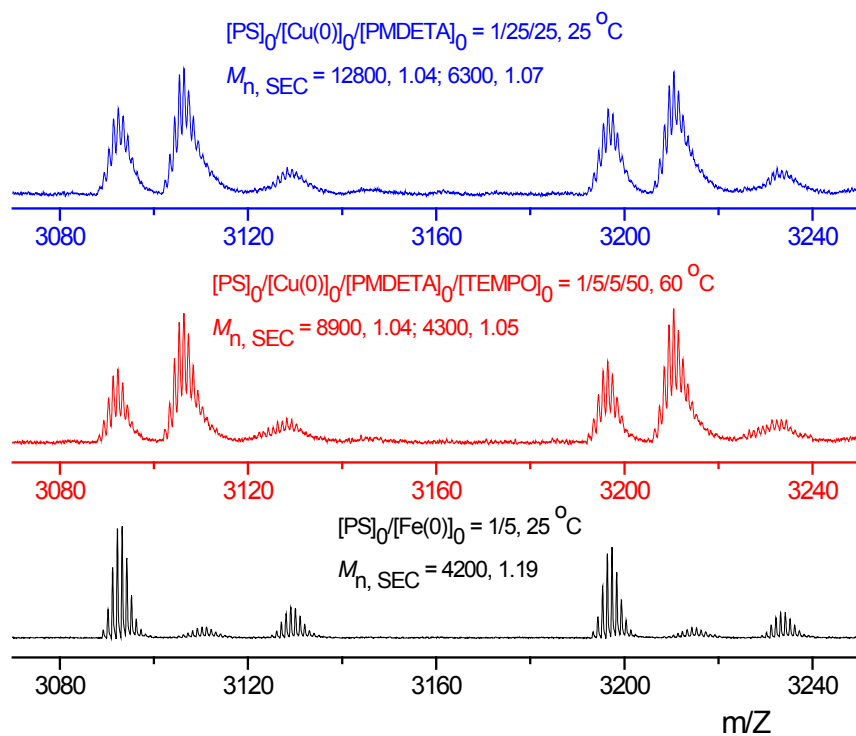

**Figure S5.** Matrix assisted laser desorption/ionization time of flight (MALDI-TOF) mass spectrometry of PS treated under different conditions.

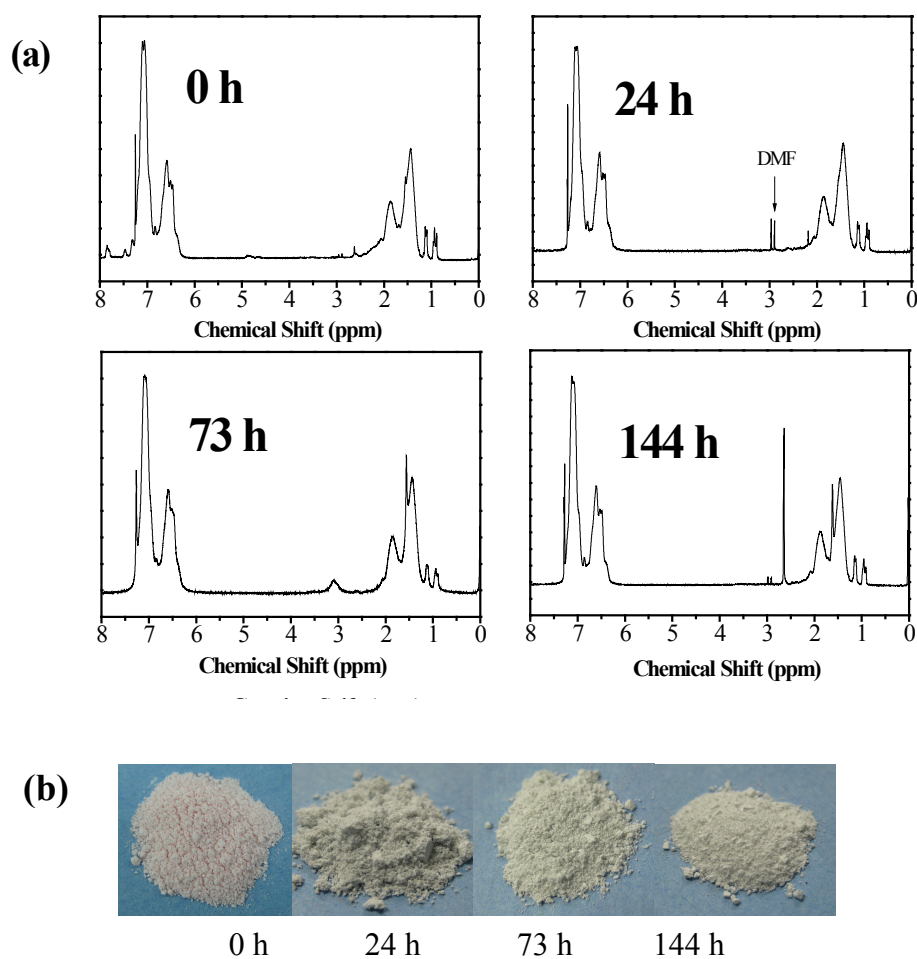

**Figure S6.**  $^1\text{H}$  NMR spectra of original PS and resultant PS (a) and photographs (b) before and after the treatment of PS catalyzed by Fe(0) powder. Original PS:  $[\text{St}]_0/[\text{CPDB}]_0/[\text{AIBN}]_0 = 500/5/1$ , time = 71 h, Conversion = 68.5 %, 60 °C, St = 10.0 mL, toluene = 4.0 mL; Treated conditions:  $[\text{PS}]_0/[\text{Fe}(0) \text{ powder}]_0 = 1/5$ , PS = 0.2001 g, DMF = 1.0 mL, 25 °C, 24 h, 73 h, 144 h.

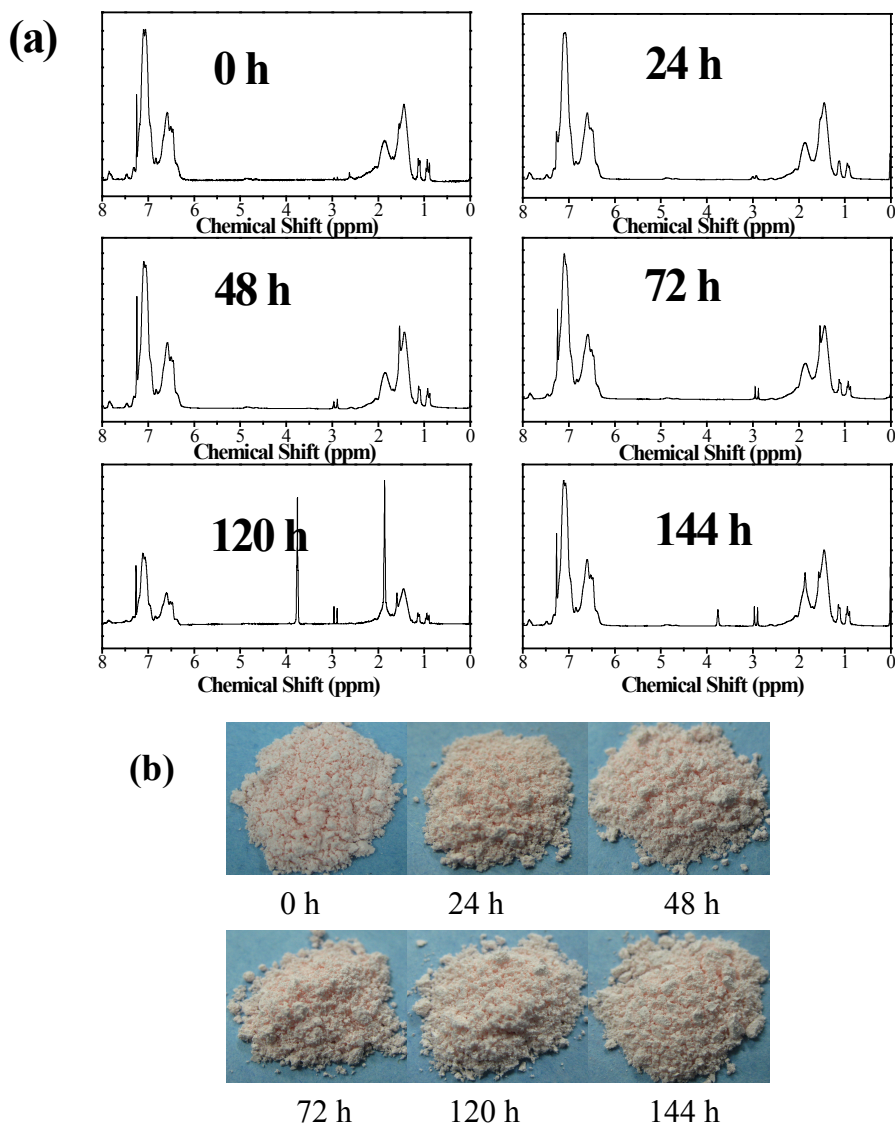

**Figure S7.**  $^1\text{H}$  NMR spectra of original PS and resultant PS (a) and photographs (b) before and after the treatment of PS catalyzed by Fe(0) powder/TEMPO. Original PS:  $[\text{St}]_0/[\text{CPDB}]_0/[\text{AIBN}]_0 = 500/5/1$ , time = 71 h, conversion = 68.5 %, 60 °C, St = 10.0 mL, toluene = 4.0 mL; Treated conditions:  $[\text{PS}]_0/[\text{Fe}(0) \text{ powder}]_0/[\text{TEMPO}]_0 = 1/5/5$ , PS = 0.2002 g, DMF = 1.0 mL, 25 °C, 24 h, 48 h, 72 h, 120 h, 144 h.



(a)  $[\text{PS}]_0/[\text{Fe}(0) \text{ powder}]_0/[\text{TEMPO}]_0 = 1/5/5, 60^\circ\text{C}$

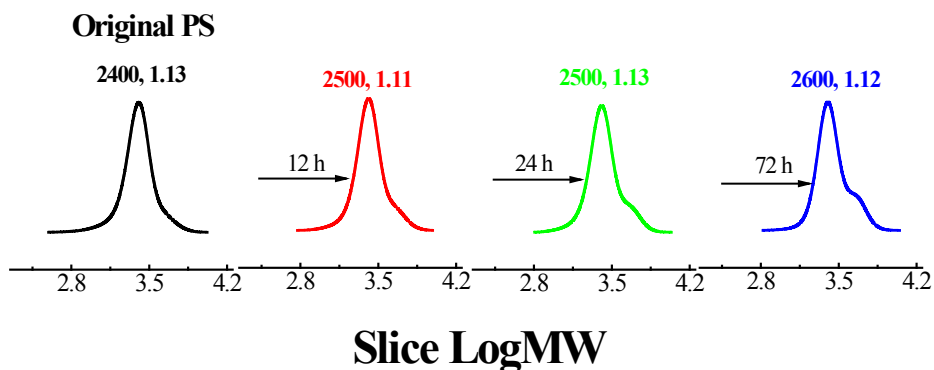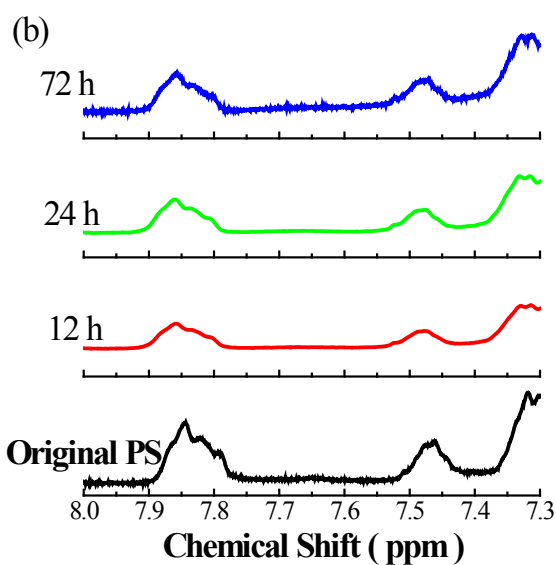

(c)

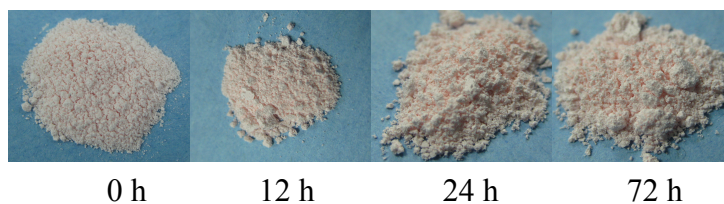

**Figure S8.** SEC traces (a) enlarged  $^1\text{H}$  NMR signals of thiocarbonylthio groups (b) and photographs (c) before and after the treatment of PS catalyzed by Fe(0) powder/TEMPO. Original PS:  $[\text{St}]_0/[\text{CPDB}]_0/[\text{AIBN}]_0 = 500/5/1$ , time = 71 h, conversion = 68.5 %,  $60^\circ\text{C}$ , St = 10.0 mL, toluene = 4.0 mL; Treated conditions:  $[\text{PS}]_0/[\text{Fe}(0) \text{ powder}]_0/[\text{TEMPO}]_0 = 1/5/5$ , PS = 0.2000 g, DMF = 1.0 mL,  $60^\circ\text{C}$ , 12 h, 24 h, 72 h.
